# Supplementary material for: Clinical, pathological, and computed tomography morphological features of lung cancer with spread through air spaces
Source: PubMed Central journal article supplement — Transl Lung Cancer Res. 2024 Oct 21;13(10):2802–12. doi: 10.21037/tlcr-24-715 (PMC11535835; doi:10.21037/tlcr-24-715), 2024-10-21
Supplement: tlcr-13-10-2802-dss.pdf [file tlcr-13-10-2802-dss.pdf]

## Data Sharing Statement

|                     |                                                                                                                                                     |                                                                                                                                                                                                                                                                                                                                                                                                                                                                                                                                                                                                                                                                                                                                               |
|---------------------|-----------------------------------------------------------------------------------------------------------------------------------------------------|-----------------------------------------------------------------------------------------------------------------------------------------------------------------------------------------------------------------------------------------------------------------------------------------------------------------------------------------------------------------------------------------------------------------------------------------------------------------------------------------------------------------------------------------------------------------------------------------------------------------------------------------------------------------------------------------------------------------------------------------------|
| <b>Article Info</b> | <a href="https://dx.doi.org/10.21037/tlcr-24-715">https://dx.doi.org/10.21037/tlcr-24-715</a>                                                       |                                                                                                                                                                                                                                                                                                                                                                                                                                                                                                                                                                                                                                                                                                                                               |
| <b>Item</b>         | <b>Question</b>                                                                                                                                     | <b>Authors' Response<br/>(place "-" if not applicable)</b>                                                                                                                                                                                                                                                                                                                                                                                                                                                                                                                                                                                                                                                                                    |
| 1                   | Would you like to share data collected for your study to others?                                                                                    | No, thanks.                                                                                                                                                                                                                                                                                                                                                                                                                                                                                                                                                                                                                                                                                                                                   |
| 2                   | If not, would you like to share the reason for your decision?                                                                                       | We express our sincere gratitude for the editor's diligent attention and acknowledgment of our research endeavors. We fully acknowledge the significance of data sharing as stipulated by SCI journals. However, owing to the policies and confidentiality agreements adhered to in our institution, we regretfully cannot furnish the raw data. Nevertheless, we have meticulously presented a comprehensive account of the experimental design, analysis, results, and the procedures employed for data analysis and processing. Should the esteemed editor and reviewers require further elucidation or specific inquiries pertaining to the data, we pledge our utmost" commitment to providing detailed explanations and clarifications. |
| 3                   | What data in particular will be shared?                                                                                                             | -                                                                                                                                                                                                                                                                                                                                                                                                                                                                                                                                                                                                                                                                                                                                             |
| 4                   | Any other documents will be shared? Such as study protocol, statistical analysis plan, informed consent form, clinical study report, analytic code. | No, thanks!                                                                                                                                                                                                                                                                                                                                                                                                                                                                                                                                                                                                                                                                                                                                   |
| 5                   | When will data availability begin?                                                                                                                  | -                                                                                                                                                                                                                                                                                                                                                                                                                                                                                                                                                                                                                                                                                                                                             |
| 6                   | When will data availability end?                                                                                                                    | -                                                                                                                                                                                                                                                                                                                                                                                                                                                                                                                                                                                                                                                                                                                                             |
| 7                   | To whom will you share the data?                                                                                                                    | -                                                                                                                                                                                                                                                                                                                                                                                                                                                                                                                                                                                                                                                                                                                                             |

|    |                                                  |   |
|----|--------------------------------------------------|---|
| 8  | For what type of analysis or purpose?            | - |
| 9  | How or where can the data/documents be obtained? | - |
| 10 | Any other restrictions?                          | - |
